# Supplementary material
Source: PubMed Central journal article supplement (PMC5117110)
Supplement: NIHMS827817-supplement-Supporting_information.pdf [file NIHMS827817-supplement-Supporting_information.pdf]

## Electronic Supplementary Material

### Metal complexation chemistry used for phosphate and nucleotide determination: an investigation of the $\text{Yb}^{3+}$ -pyrocatechol violet sensor

Ernestas Gaidamauskas<sup>a</sup>, Kanokkarn Saejueng<sup>b</sup>, Alvin A. Holder<sup>a</sup>, Subalita Baruah<sup>a</sup>, Boris A. Kashemirov<sup>b</sup>, Debbie C. Crans<sup>a\*</sup>, Charles E. McKenna<sup>b\*</sup>

<sup>a</sup>Department of Chemistry, Colorado State University, Fort Collins, CO 80523-1872

<sup>b</sup>Department of Chemistry, USC, Los Angeles, CA 90089-0744

Debbie C. Crans: Fax: 970-491-1801; E-mail: [crans@lamar.colostate.edu](mailto:crans@lamar.colostate.edu)

Charles E. McKenna: Fax: 213-740-0930; E-mail: [mckenna@usc.edu](mailto:mckenna@usc.edu)

#### CONTENTS

**Figure S1.** The absorbance spectra upon addition of ATP to the 2:1 and 1:1  $\text{Yb}^{3+}$  : PV sensor

**Figure S2.** The absorbance spectra upon addition of  $\text{P}_i$  to the 2:1 and 1:1  $\text{Yb}^{3+}$  : PV sensor

**Figure S3.** Speciation diagrams for solutions of  $\text{Yb}^{3+}$  and ATP.  $\text{Yb}^{3+}$  hydrolysis species are not included

**Figure S4.** Speciation diagrams for solutions of  $\text{Yb}^{3+}$  and ATP.  $\text{Yb}^{3+}$  hydrolysis species are included

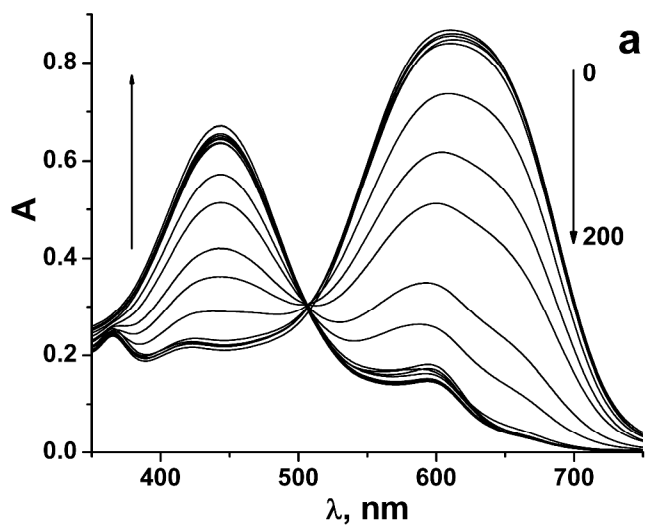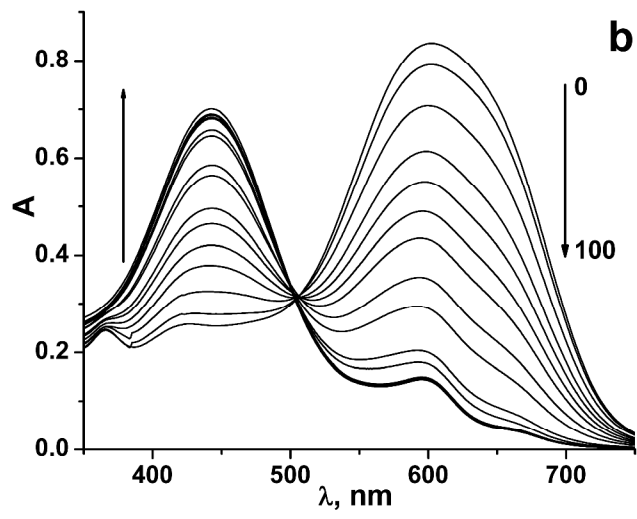

**Figure S1.** The absorbance spectra upon addition of ATP to the 100  $\mu\text{M}$   $\text{Yb}^{3+}$  and 50  $\mu\text{M}$  PV solution (a) and to the 50  $\mu\text{M}$   $\text{Yb}^{3+}$  and 50  $\mu\text{M}$  PV solution (b) in 10 mM HEPES buffer (pH 7.0). ATP concentration range (in  $\mu\text{M}$ ) is shown next to the spectra.

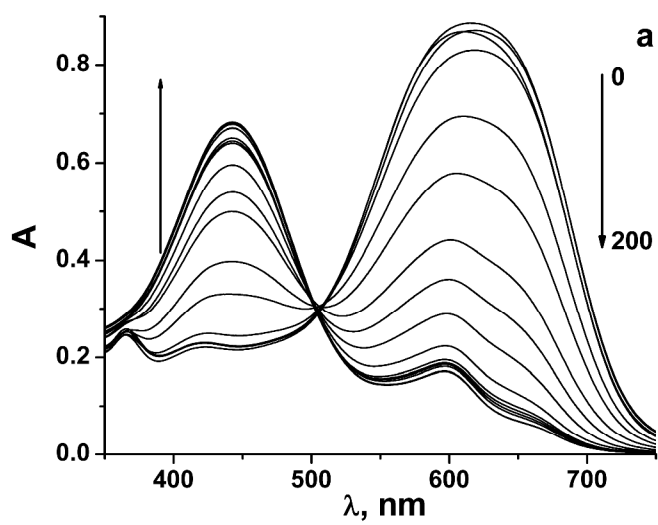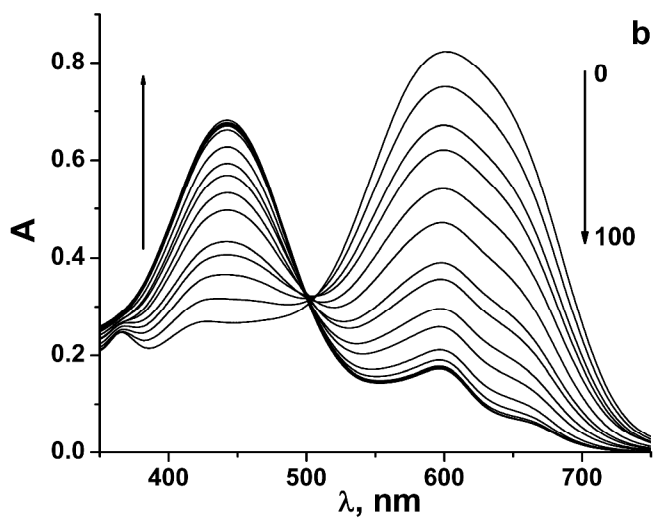

**Figure S2.** The absorbance spectra upon addition of  $\text{P}_i$  to the 100  $\mu\text{M}$   $\text{Yb}^{3+}$  and 50  $\mu\text{M}$  PV solution (a) and to the 50  $\mu\text{M}$   $\text{Yb}^{3+}$  and 50  $\mu\text{M}$  PV solution (b) in 10 mM HEPES buffer (pH 7.0).  $\text{P}_i$  concentration range (in  $\mu\text{M}$ ) is shown next to the spectra.

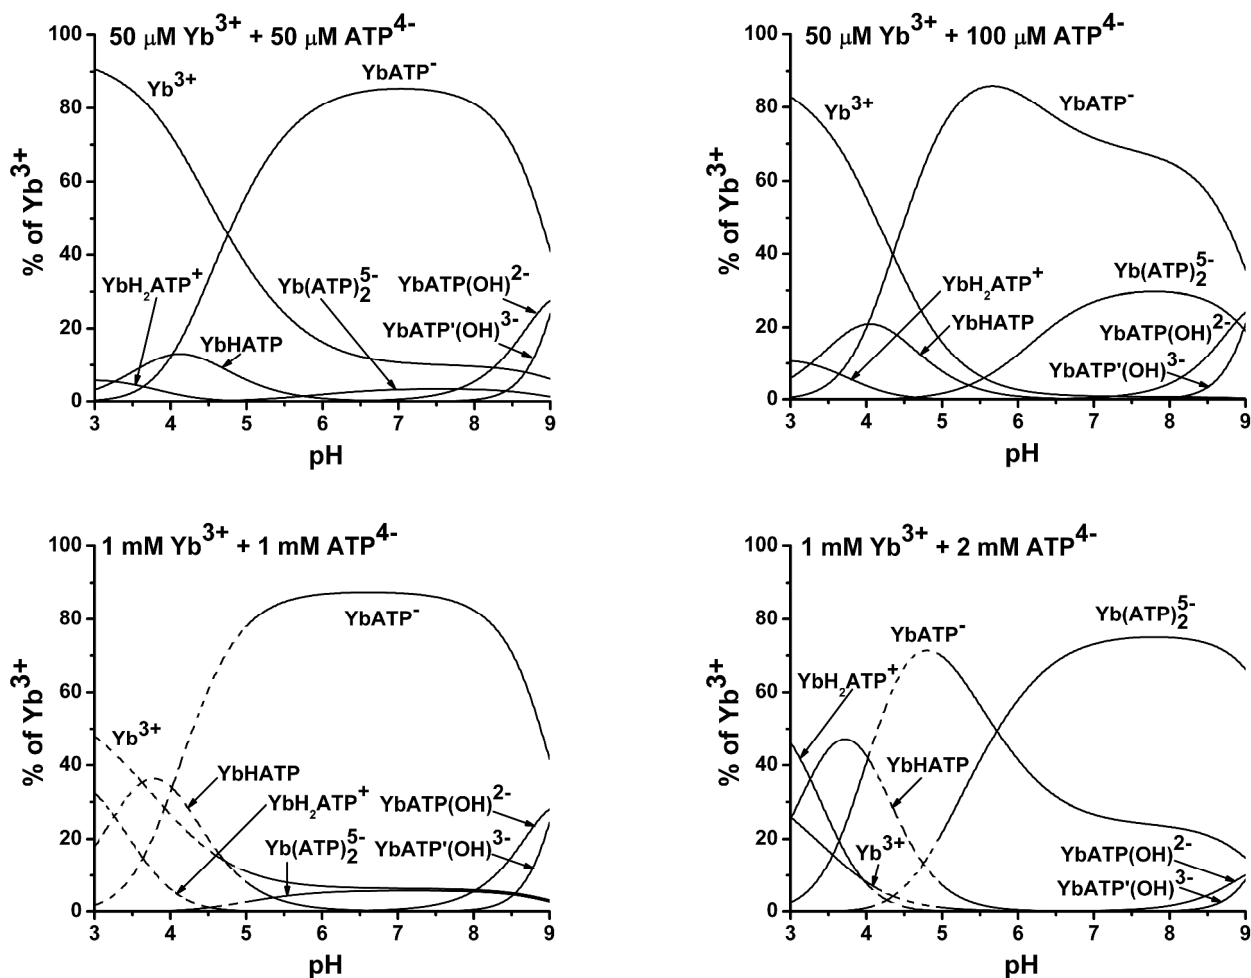

**Figure. S3.** Speciation diagrams for solutions of Yb<sup>3+</sup> and ATP in 0.1 M KCl. The data used were derived from Ref. [28]: ATPH<sup>3-</sup> (log β<sub>011</sub> = 6.47), ATPH<sub>2</sub><sup>2-</sup> (log β<sub>012</sub> = 10.47), ATPH<sub>3</sub><sup>-</sup> (log β<sub>013</sub> = 12.64), ATPH<sub>4</sub> (log β<sub>014</sub> = 14.69) ATP'H<sub>1</sub> (log β<sub>01-1</sub> = -11.78), YbATP<sup>-</sup> (log β<sub>110</sub> = 6.44), YbATPH (log β<sub>111</sub> = 10.46), YbATPH<sub>2</sub><sup>+</sup> (log β<sub>112</sub> = 13.72), YbATP(OH)<sub>2</sub><sup>2-</sup> (log β<sub>11-1</sub> = -2.73), YbATP'(OH)<sub>3</sub><sup>3-</sup> (log β<sub>11-2</sub> = -11.79), YbATP<sub>2</sub><sup>5-</sup> (log β<sub>120</sub> = 10.56). Dashed lines indicate conditions where precipitates may form.

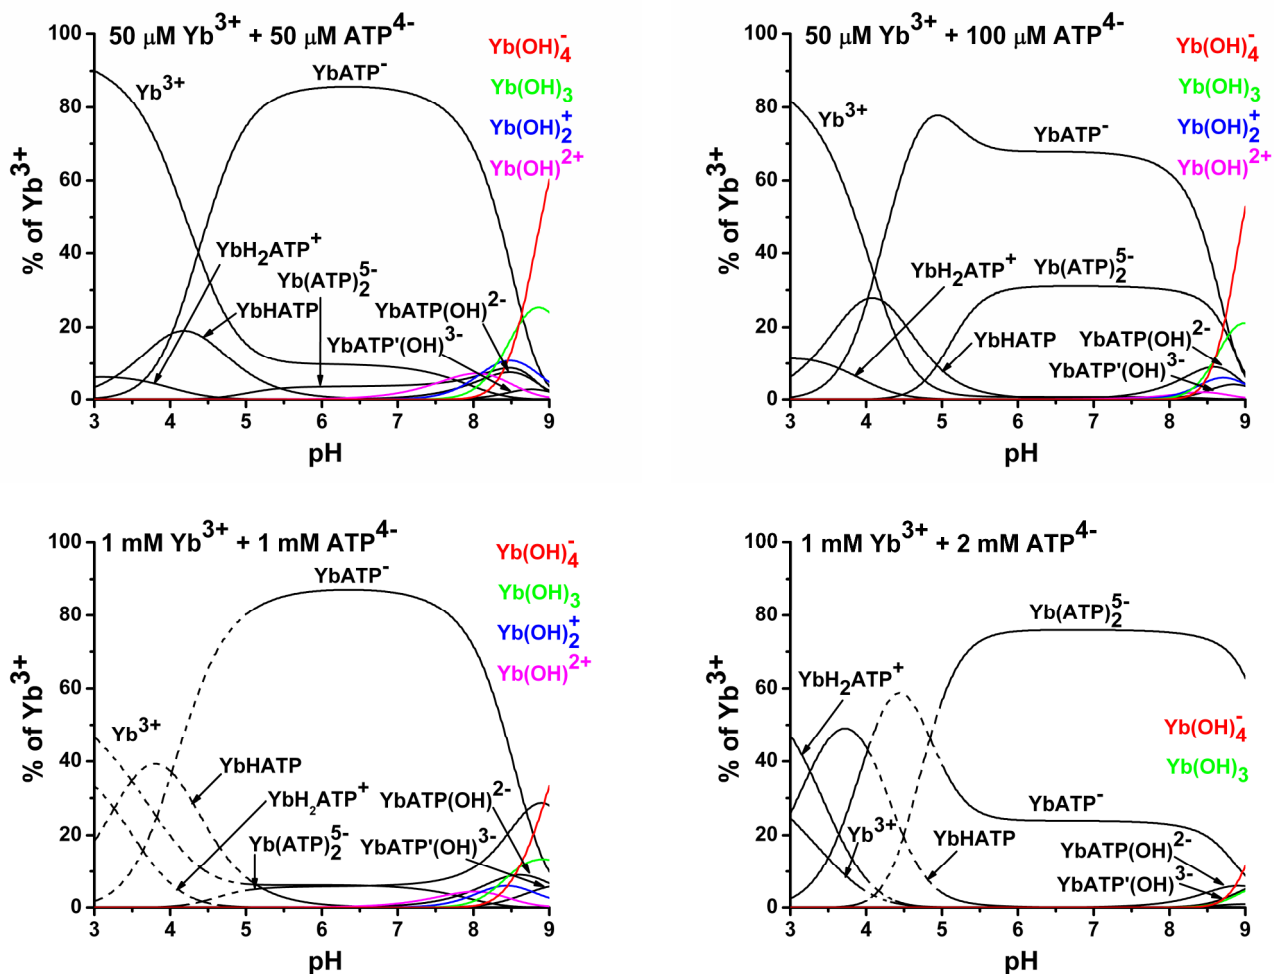

**Figure. S4.** Speciation diagrams for solutions of  $\text{Yb}^{3+}$  and  $\text{ATP}^{4-}$ . The data used were derived from Ref. [28]:  $\text{ATPH}^{3-}$  ( $\log \beta_{011} = 6.47$ ),  $\text{ATPH}_2^{2-}$  ( $\log \beta_{012} = 10.47$ ),  $\text{ATPH}_3^{-}$  ( $\log \beta_{013} = 12.64$ ),  $\text{ATPH}_4$  ( $\log \beta_{014} = 14.69$ )  $\text{ATP}'\text{H}_1$  ( $\log \beta_{01-1} = -11.78$ ),  $\text{YbATP}^{-}$  ( $\log \beta_{110} = 6.44$ ),  $\text{YbATPH}$  ( $\log \beta_{111} = 10.46$ ),  $\text{YbATPH}_2^{+}$  ( $\log \beta_{112} = 13.72$ ),  $\text{YbATP(OH)}^{2-}$  ( $\log \beta_{11-1} = -2.73$ ),  $\text{YbATP'(OH)}^{3-}$  ( $\log \beta_{11-2} = -11.79$ ),  $\text{YbATP}_2^{5-}$  ( $\log \beta_{120} = 10.56$ ).  $\text{Yb}^{3+}$  hydrolysis species formation constants were taken from Ref. [50]:  $\text{Yb(OH)}^{2+}$  ( $\log \beta_{10-1} = -7.7$ ),  $\text{Yb(OH)}_2^{+}$  ( $\log \beta_{10-2} = -15.8$ ),  $\text{Yb(OH)}_3$  ( $\log \beta_{10-3} = -24.1$ ), and  $\text{Yb(OH)}_4^{-}$  ( $\log \beta_{10-4} = -32.7$ ). Dashed lines indicate conditions where precipitates may form.
